# Supplementary material
Source: PubMed Central journal article supplement (PMC10114498)
Supplement: NIHMS1616970-supplement-Supplemental_Figures.pdf [file NIHMS1616970-supplement-Supplemental_Figures.pdf]

# Figure S1

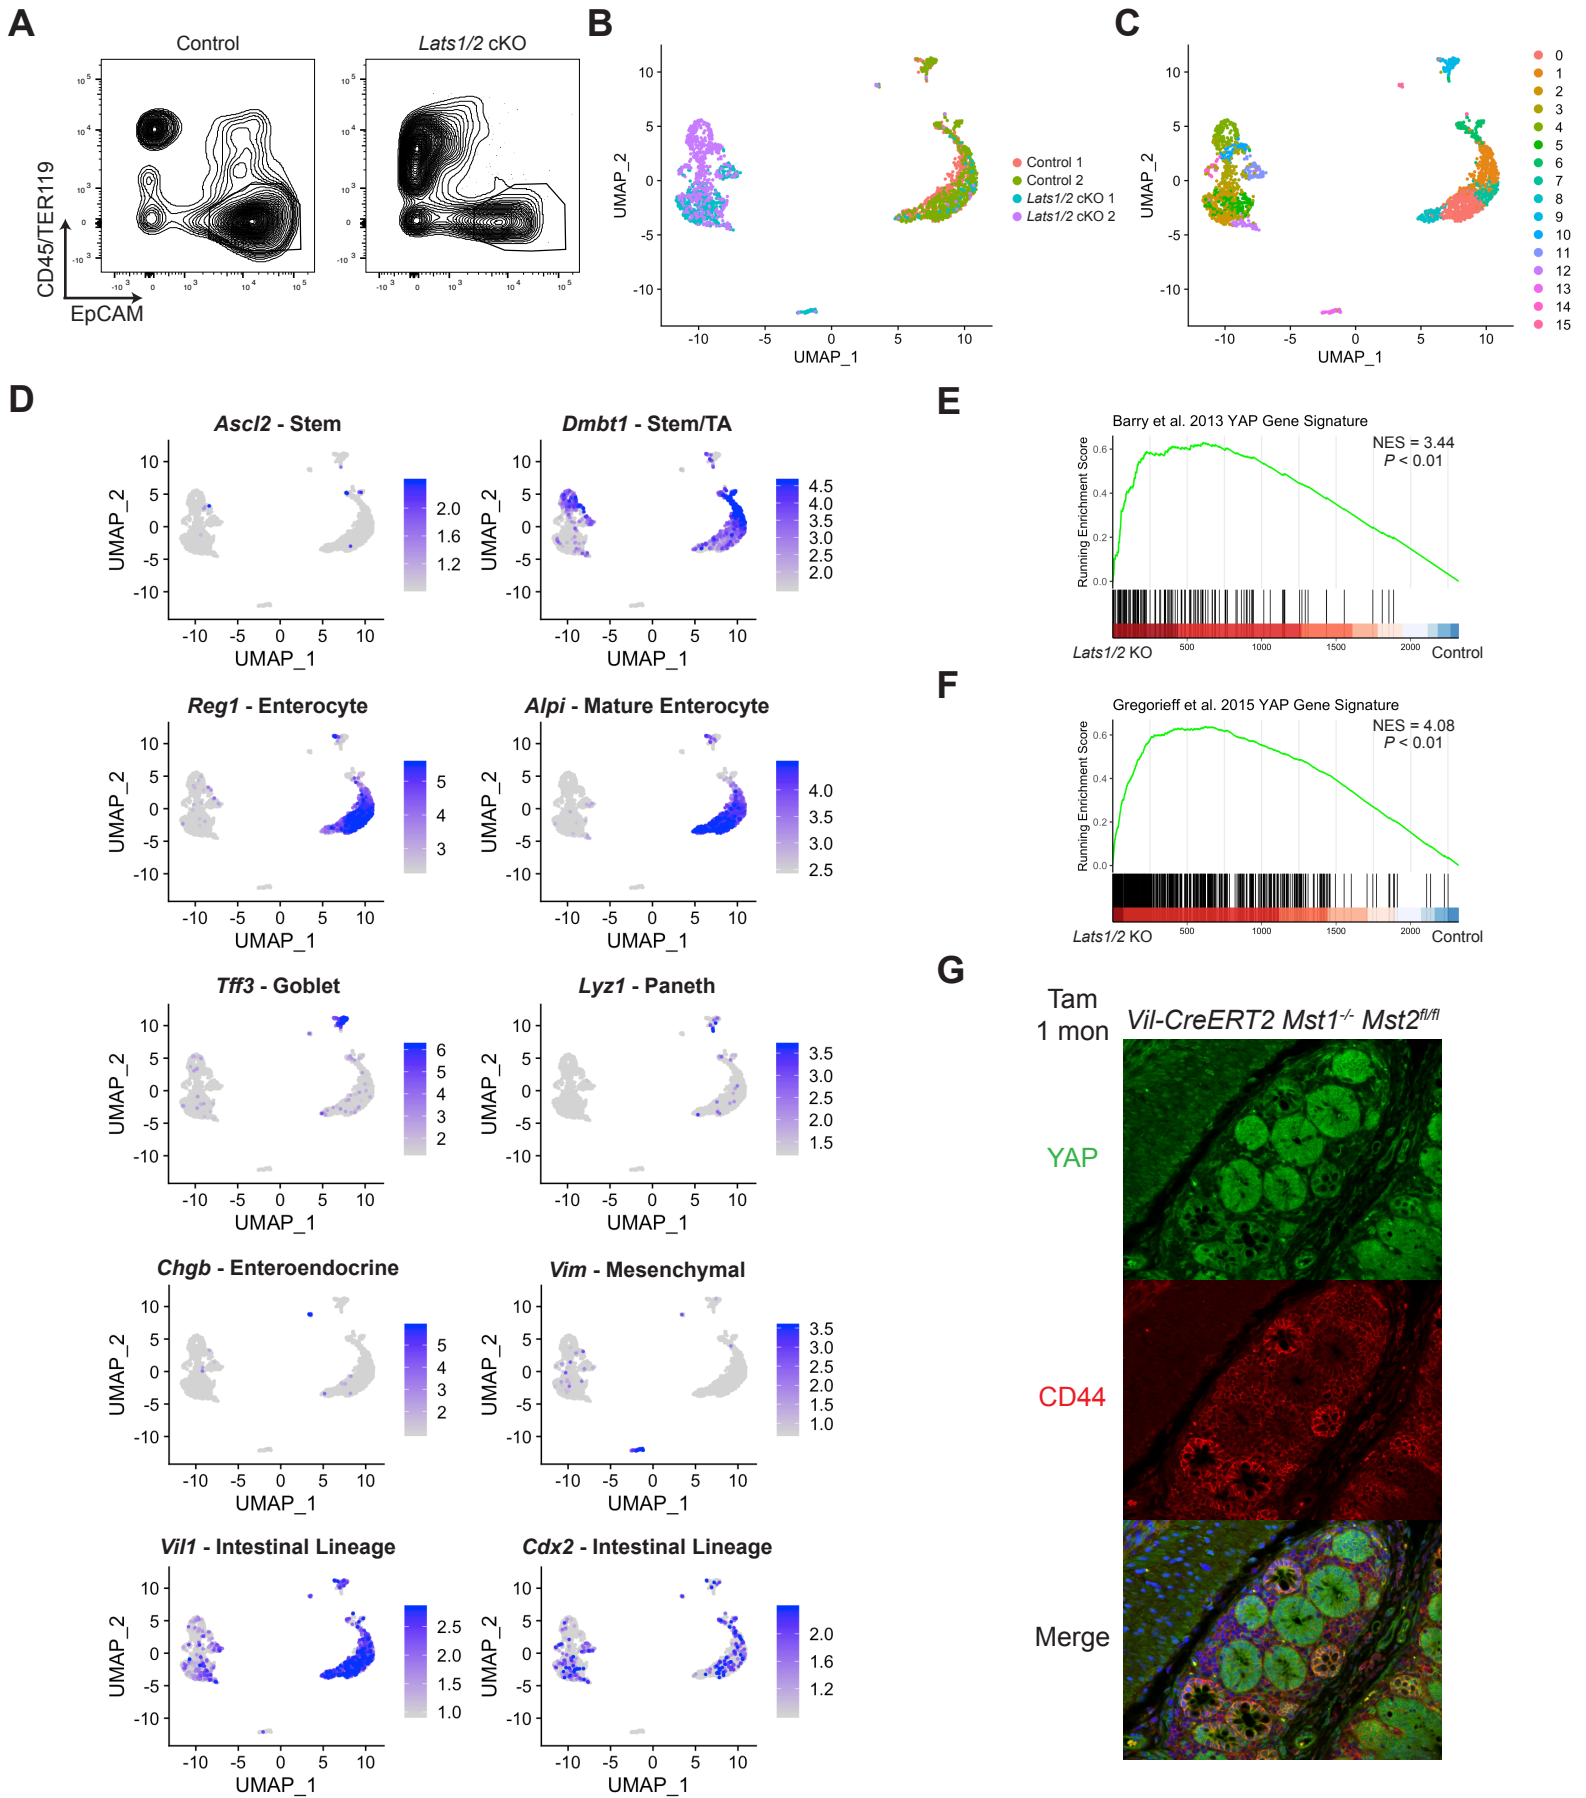

**Figure S1: Single Cell Analysis of Intestinal *Lats1/2* Knockout Cells, Related to Figure 1**

(A) Gating strategy for isolation of intestinal epithelial cells by FACS. Cells from control and *Lats1/2* cKO mice were sorted on forward scatter and side scatter and subsequently by EpCAM+, Lin- (CD45, TER119), and DAPI-. Sorted cells were encapsulated for scRNA-seq.

(B) UMAP representation of scRNA-seq data of intestinal epithelial cells from 2 control and 2 *Lats1/2* cKO animals in the indicated colors.

(C) Unsupervised clustering of control and *Lats1/2* cKO cells.

(D) UMAP showing normalized expression of cell-type specific markers.

(E-F) GSEA of a YAP gene signature from Barry et al., 2013 (E) and Gregorieff et al., 2015 (F) in *Lats1/2* KO cells compared to control cells.

(G) IF for YAP (green) and CD44 (red) in crypts of *Vil-CreERT2 Mst1<sup>-/-</sup> Mst2<sup>fl/fl</sup>* mice 1 month after tamoxifen injection. Sections were counterstained with DAPI (blue).

# Figure S2

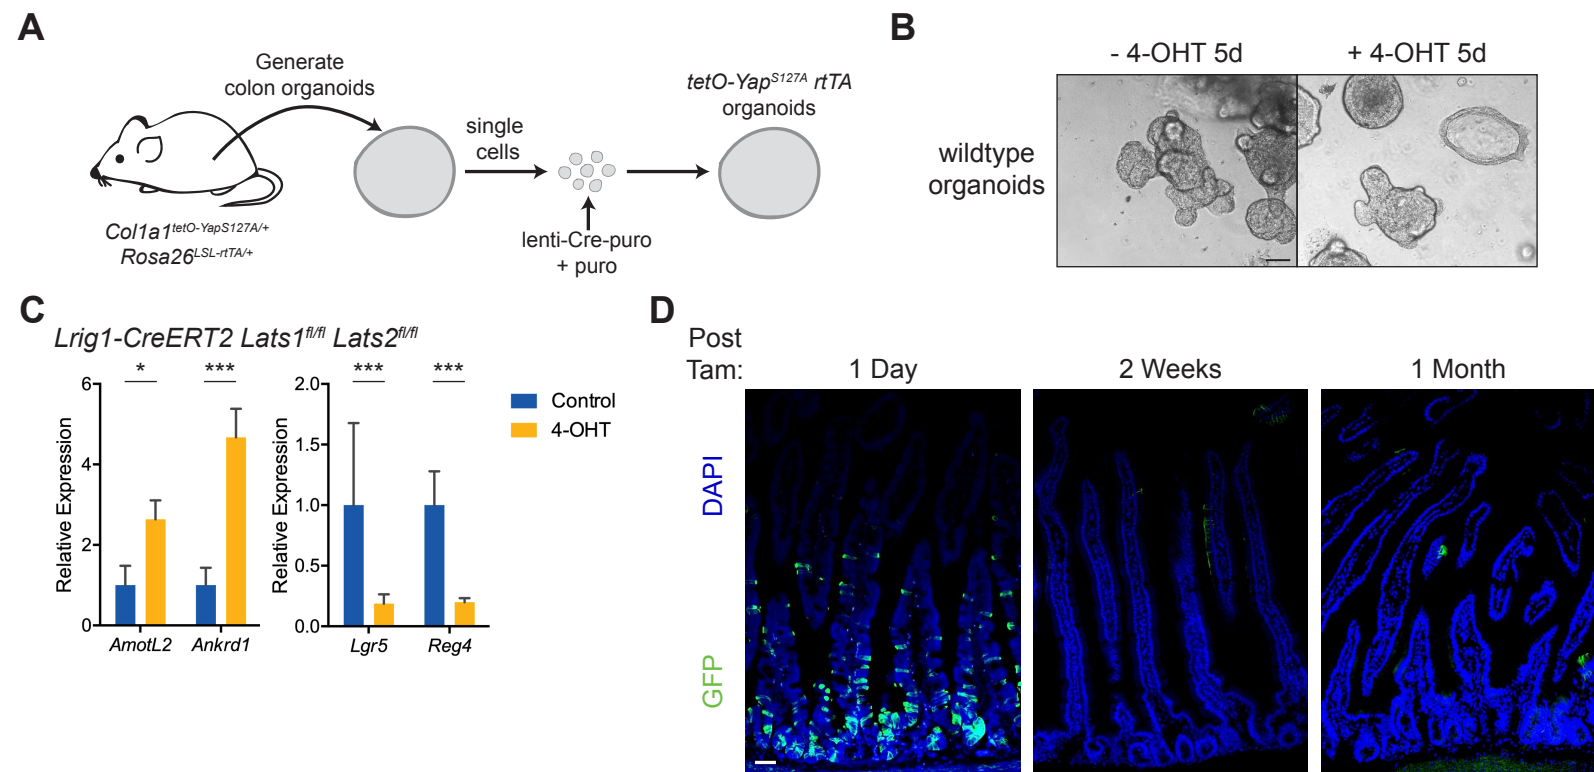

**Figure S2: YAP Suppresses Stem Cell Function, Related to Figure 2**

(A) Schematic for generating *tetO-YAP<sup>S127A</sup> rtTA* organoids.

(B) Brightfield images of wildtype colon organoids five days after treatment with 4-OHT for 24 hours. Scale bar, 200  $\mu$ m.

(C) RT-qPCR analysis of the indicated genes in *Lrig1-CreERT2 Lats1<sup>fl/fl</sup> Lats2<sup>fl/fl</sup>* organoids 2 days after induction with 4-OHT for 24 hours. Data are represented as mean  $\pm$  SEM;  $n = 2$  biological and 2 technical replicates. \* $P < 0.05$  and \*\*\* $P < 0.001$ .

(D) IF for GFP and DAPI in the small intestine of *Lgr5-CreERT2 Lats1<sup>fl/fl</sup> Lats2<sup>fl/fl</sup> Rosa26<sup>mT/mG</sup>* at the indicated times after the second injection with tamoxifen.

**Figure S3**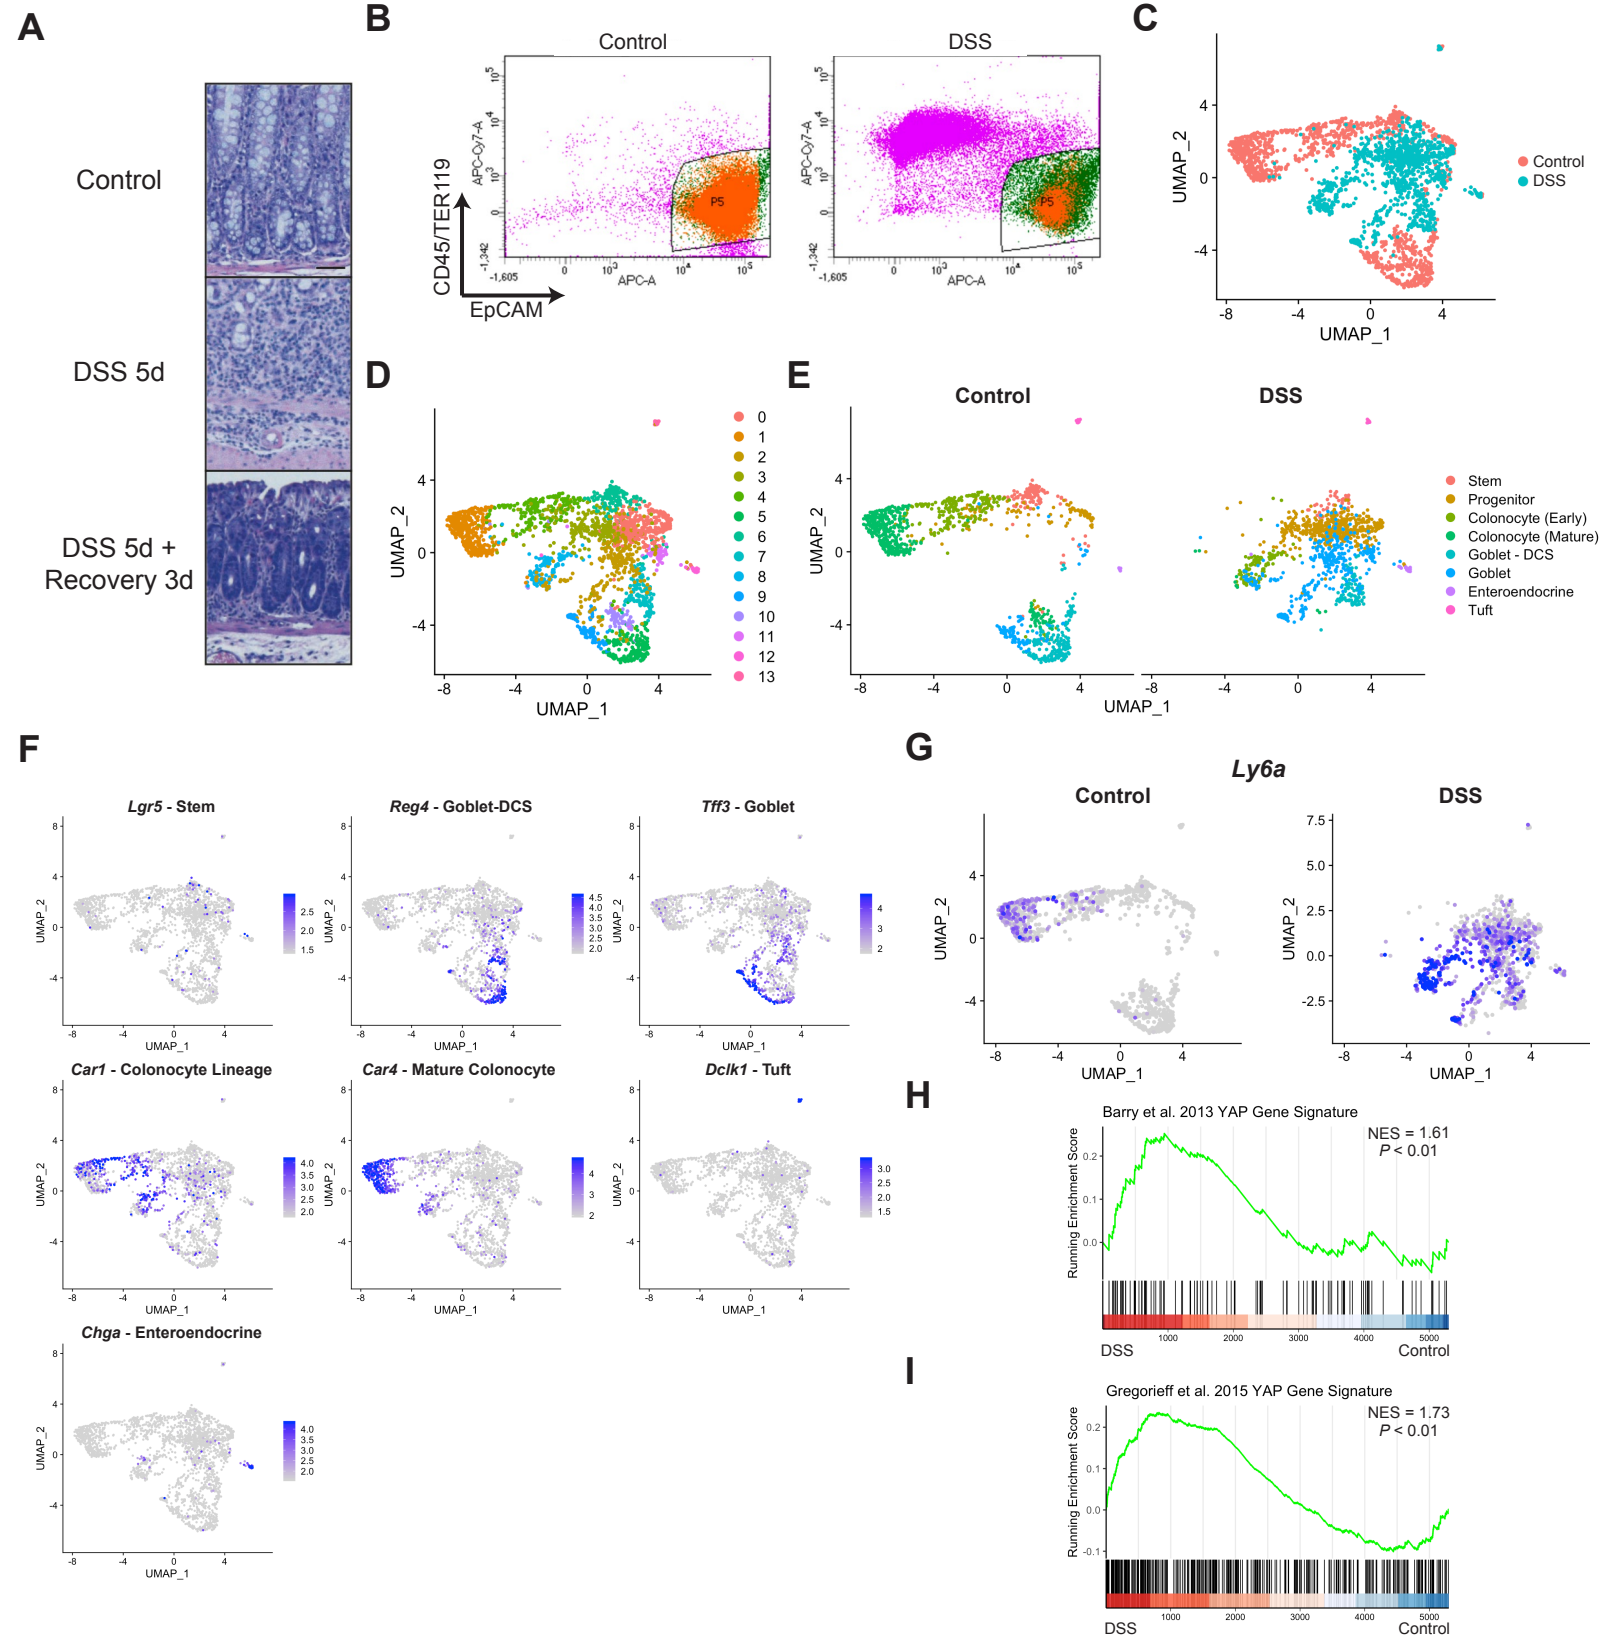



**Figure S3: Single Cell Analysis of Regenerating Epithelial Cells, Related to Figure 3**

- (A) H&E stains of colonic samples from mice following DSS treatment with or without recovery. Scale bar, 50  $\mu\text{m}$ .
- (B) Gating strategy for isolation of colonic epithelial cells by FACS. Cells from control and DSS-treated mice, following a 3-day recovery period, were sorted on forward scatter and side scatter and subsequently by EpCAM+, Lin- (CD45, TER119), and DAPI-. Sorted cells were encapsulated for scRNA-seq.
- (C) UMAP representation of scRNA-seq data of colonic epithelial cells from control and DSS-treated mice, following a 3-day recovery period, in the indicated colors.
- (D) Unsupervised clustering of the DSS and control samples.
- (E) UMAP showing cell types in the indicated colors by treatment group.
- (F) UMAP showing normalized expression of cell-type specific markers.
- (G) UMAP showing normalized expression of *Ly6a/Sca1* in control and DSS samples.
- (H-I) GSEA of a YAP gene signature from Barry et al., 2013 (H) and Gregorieff et al., 2015 (I) in DSS compared to control.

# Figure S4

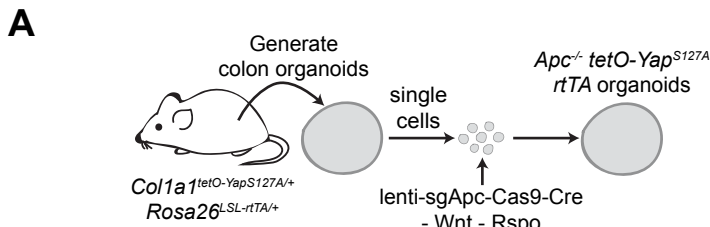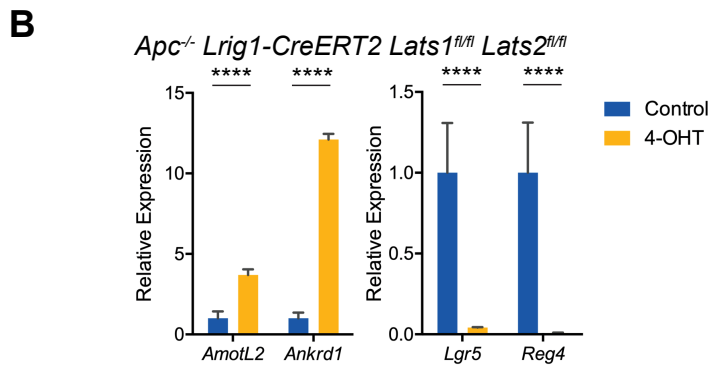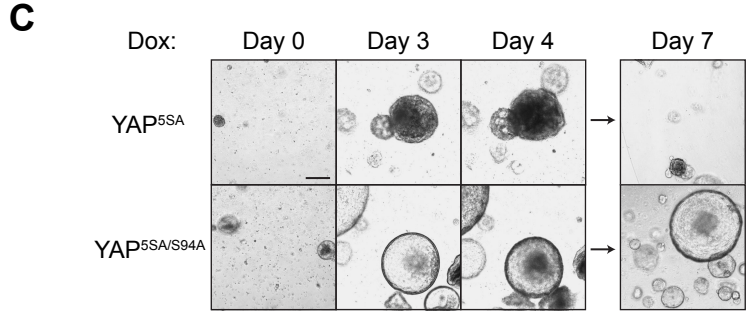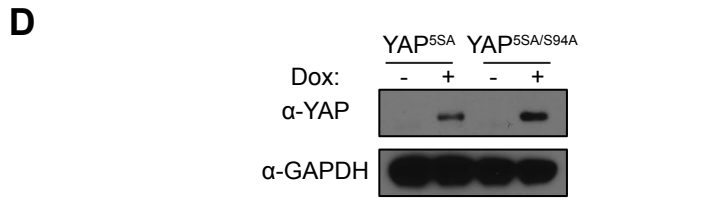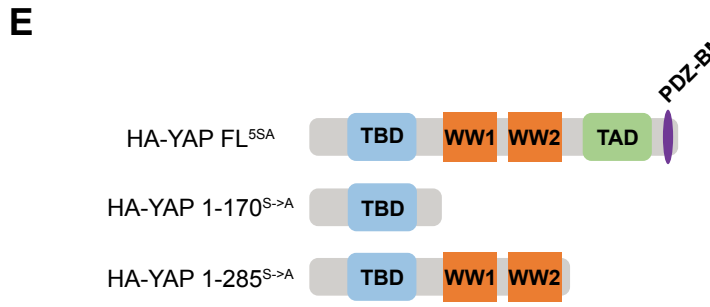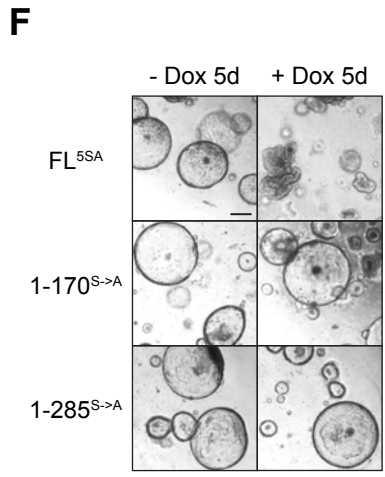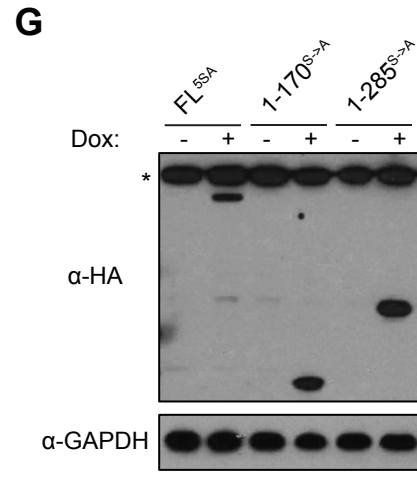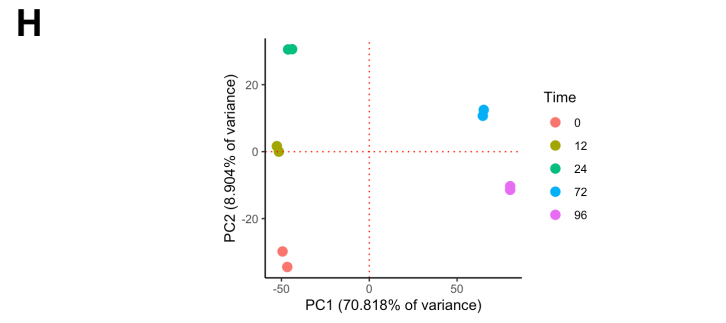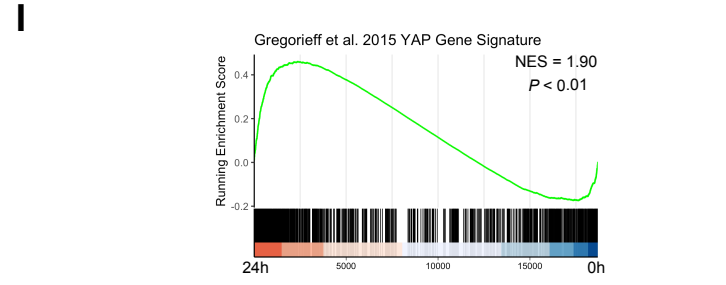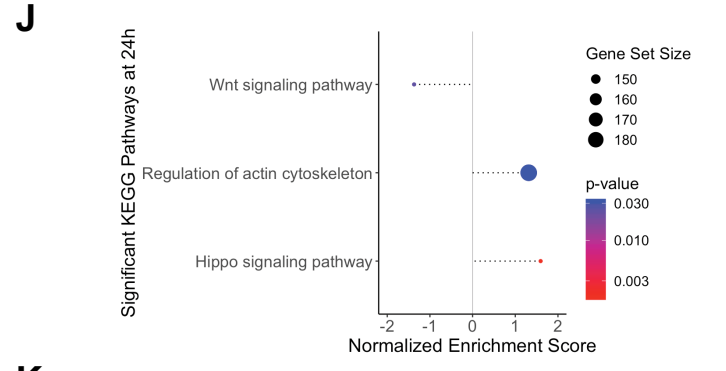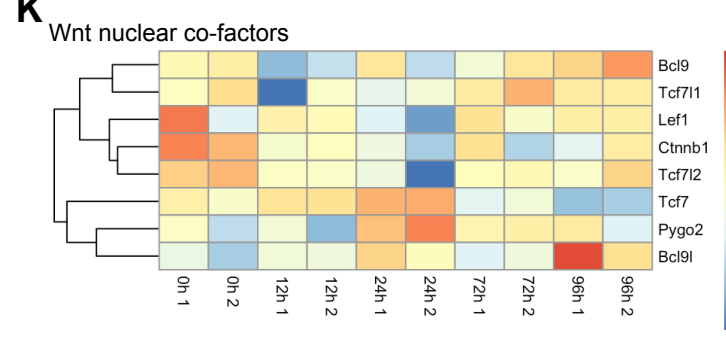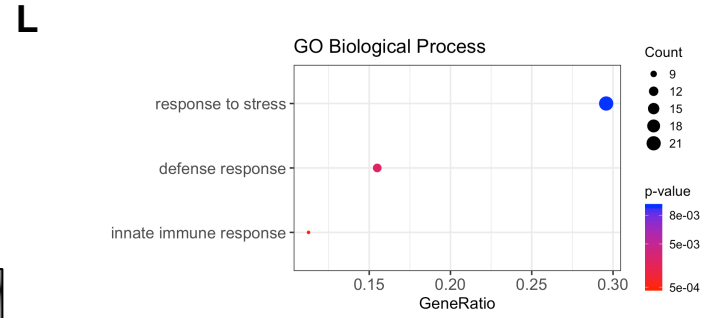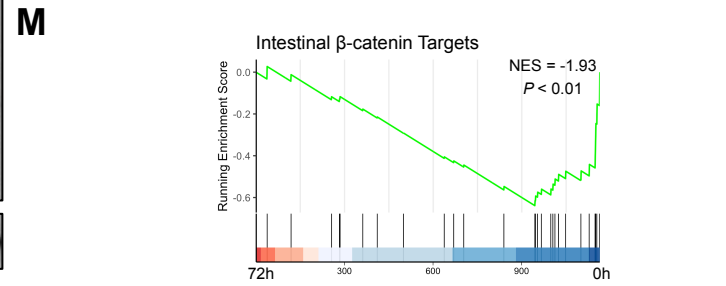

**Figure S4: YAP Mediates Transcriptional Reprogramming of *Apc*<sup>-/-</sup> Colon Cells, Related to Figure 4**

(A) Schematic for generating *Apc*<sup>-/-</sup> *tetO-YAP<sup>S127A</sup> rtTA* organoids.

(B) RT-qPCR analysis of the indicated genes in *Apc*<sup>-/-</sup> *Lrig1-CreERT2 Lats1/2<sup>fl/fl</sup>* organoids 2 days after induction with 4-OHT for 24 hours. Data are represented as mean  $\pm$  SEM; n = 2 biological and 2 technical replicates. \*\*\*\**P* < 0.0001.

(C) Brightfield images of *Apc*<sup>-/-</sup> *CAGs-rtTA3* organoids expressing doxycycline-inducible Yap<sup>5SA</sup> or YAP<sup>5SA/S94A</sup> on the indicated days in the presence of doxycycline. The organoids were split on day 4. Scale bar, 200  $\mu$ m.

(D) Western blot analysis of *Apc*<sup>-/-</sup> *CAGs-rtTA3* organoids expressing inducible YAP<sup>5SA</sup> or YAP<sup>5SA/S94A</sup> after 2 days on doxycycline. Antibodies are indicated.

(E) Schematic of the domain architecture of HA-tagged Yap<sup>5SA</sup>: full-length (FL), amino acids 1-170, and amino acids 1-285.

(F) Brightfield images of *Apc*<sup>-/-</sup> *CAGs-rtTA3* organoids expressing inducible deletion versions of HA-tagged Yap<sup>5SA</sup> for 5 days. Scale bar, 200  $\mu$ m.

(G) Western blot analysis of *Apc*<sup>-/-</sup> *CAGs-rtTA3* organoids expressing inducible deletion versions of HA-tagged YAP<sup>5SA</sup> after 2 days on doxycycline. Antibodies are indicated. The asterisk indicates a non-specific band.

(H) Principal component analysis of whole transcriptome profiles of *Apc*<sup>-/-</sup> *tetO-YAP<sup>S127A</sup> rtTA* organoids at the indicated hours following doxycycline induction.

(I-J) GSEA of a YAP gene signature from Gregorieff et al., 2015 (I) and KEGG pathways (J) in *Apc*<sup>-/-</sup> *tetO-YAP<sup>S127A</sup> rtTA* organoids 24 hours after doxycycline compared to 0 hours.

(K) Heatmap of Wnt signaling pathway nuclear co-factors over the time course of doxycycline induction in *Apc*<sup>-/-</sup> *tetO-YAP<sup>S127A</sup> rtTA* organoids.

(L) GO overrepresentation analysis of upregulated transcription factors (adjusted p-value < 0.05 and log<sub>2</sub> fold change > 1) in *Apc*<sup>-/-</sup> *tetO-YAP<sup>S127A</sup> rtTA* organoids after 72 hours on doxycycline compared to 0 hours.

(M) GSEA of intestinal  $\beta$ -catenin targets in differentially expressed transcription factors in *Apc*<sup>-/-</sup> *tetO-YAP<sup>S127A</sup> rtTA* organoids after 72 hours on doxycycline compared to 0 hours.

# Figure S5

**A**

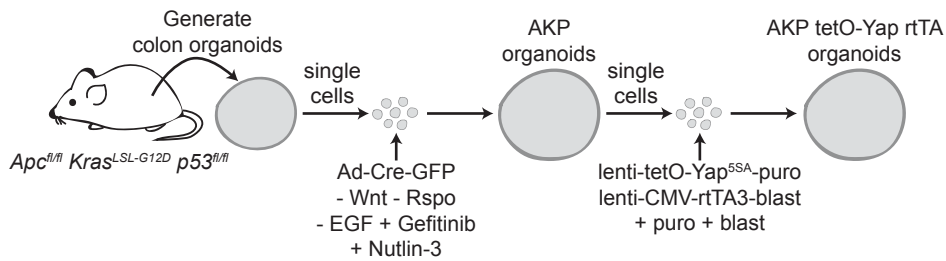

**B**

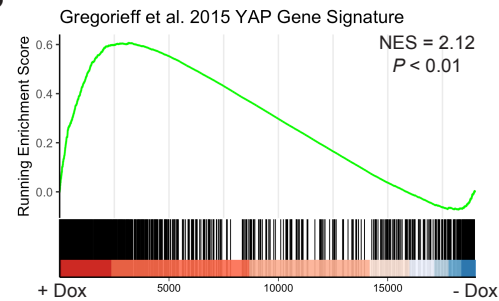

**C**

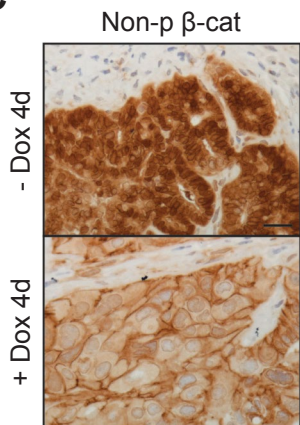

**D**

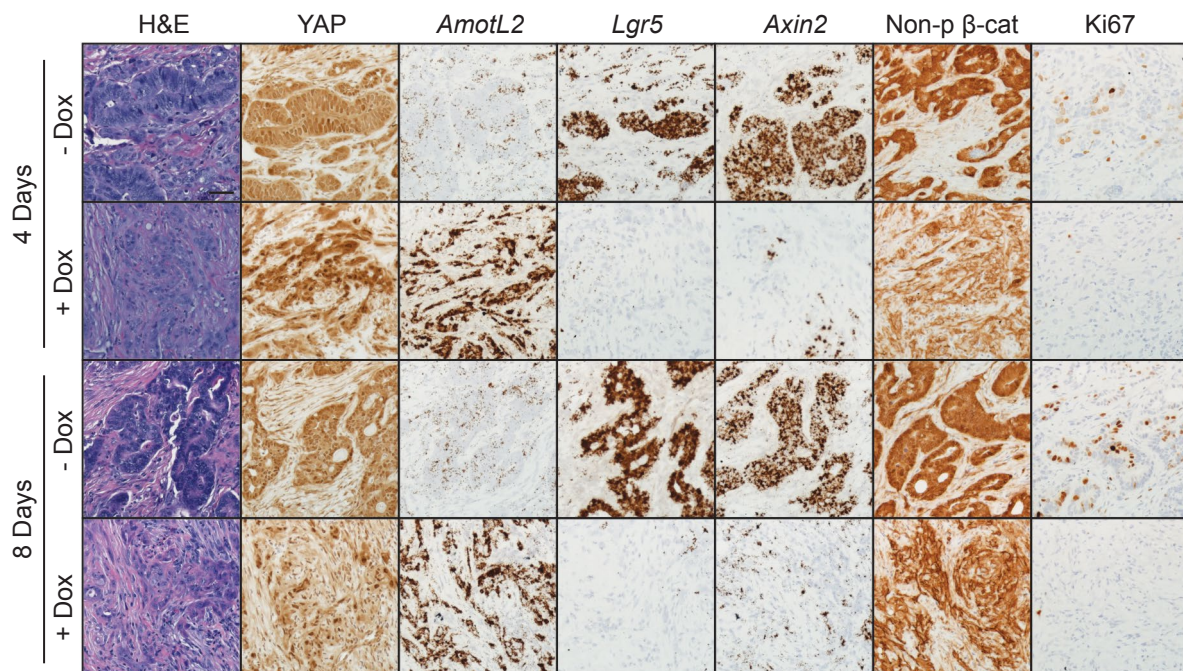

**E**

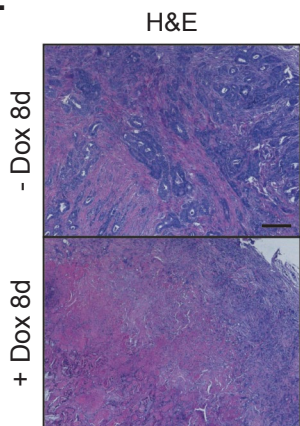

**F**

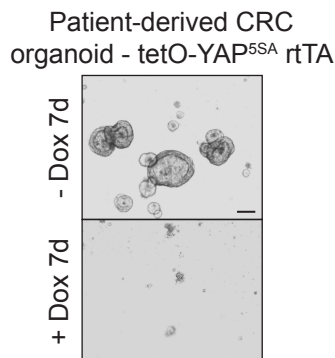

**G**

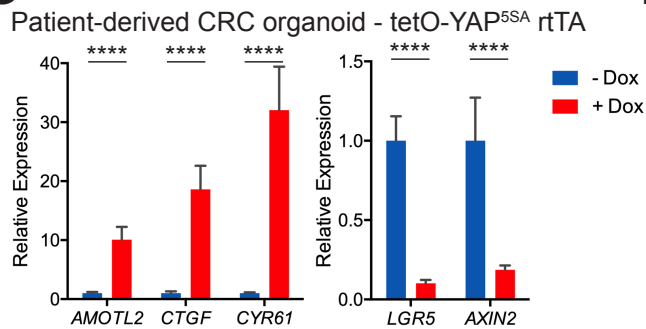

**H**

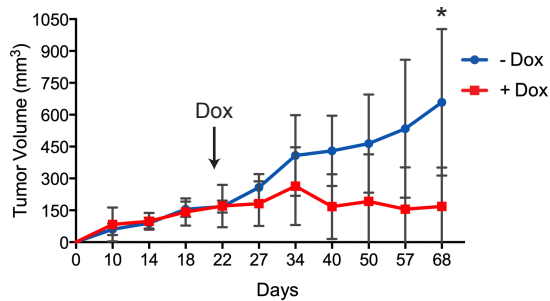

**Figure S5: YAP Activation Causes Colon Tumor Regression, Related to Figure 5**

(A) Schematic for generating *Apc*<sup>-/-</sup> *Kras*<sup>G12D</sup> *p53*<sup>-/-</sup> tetO-YAP<sup>5SA</sup> rtTA organoids.

(B) GSEA of a YAP gene signature from Gregorieff et al., 2015 in *Apc*<sup>-/-</sup> *Kras*<sup>G12D</sup> *p53*<sup>-/-</sup> tetO-YAP<sup>5SA</sup> rtTA organoids 3 days after induction with doxycycline.

(C) IHC for non-phosphorylated  $\beta$ -catenin from *Apc*<sup>-/-</sup> *Kras*<sup>G12D</sup> *p53*<sup>-/-</sup> rtTA tetO-YAP<sup>5SA</sup> orthotopic tumors 4 days after doxycycline administration. Scale bar, 50  $\mu$ m.

(D) Histological analysis of *Apc*<sup>-/-</sup> *Kras*<sup>G12D</sup> *p53*<sup>-/-</sup> tetO-YAP<sup>5SA</sup> rtTA subcutaneous tumors on the indicated days following doxycycline administration: H&E stains, IHC for YAP, non-phosphorylated  $\beta$ -catenin, and Ki67, and RNA-ISH for *AmotL2*, *Lgr5*, and *Axin2*. Scale bar, 50  $\mu$ m.

(E) H&E stains of *Apc*<sup>-/-</sup> *Kras*<sup>G12D</sup> *p53*<sup>-/-</sup> tetO-YAP<sup>5SA</sup> rtTA subcutaneous tumors 8 days after doxycycline administration. Scale bar, 200  $\mu$ m.

(F) Brightfield images of a patient-derived CRC organoid line with inducible YAP<sup>5SA</sup> overexpression after 7 days in the presence or absence of doxycycline. The organoids were split on day 4. Scale bar, 200  $\mu$ m.

(G) RT-qPCR analysis of the indicated genes in patient-derived CRC organoids overexpressing YAP<sup>5SA</sup>. Data are represented as mean  $\pm$  SEM; n = 2 biological and 2 technical replicates. \*\*\*\**P* < 0.0001.

(H) Growth curve of subcutaneous tumors from patient-derived CRC organoids overexpressing YAP<sup>5SA</sup> injected in the flanks of nude mice. The arrow indicates the day doxycycline treatment was started. Measurements were started one week after injection (shown as day 0 on the graph). Data are represented as mean  $\pm$  SD. \**P* < 0.05.



# Figure S6

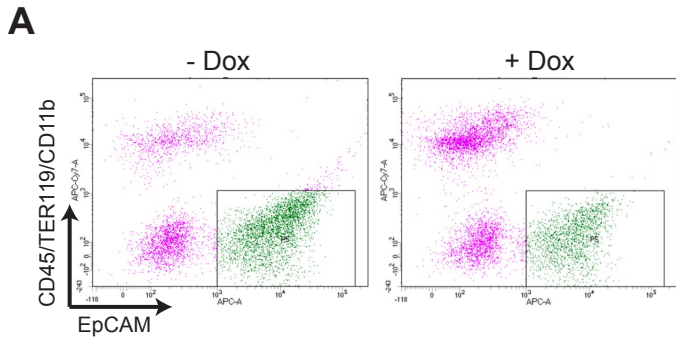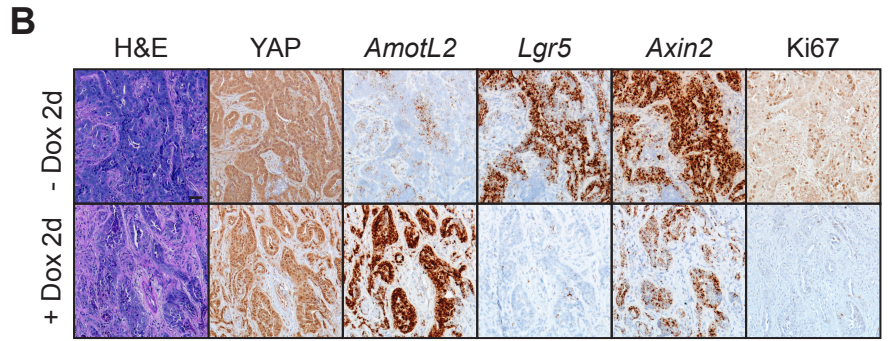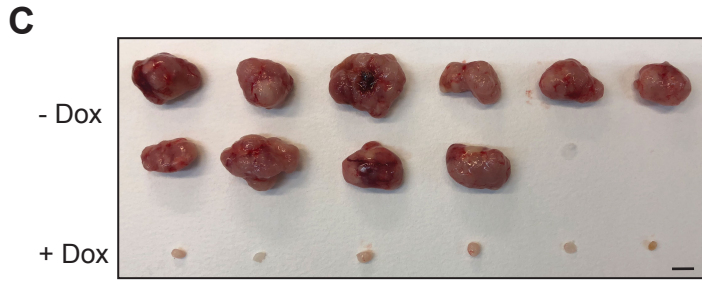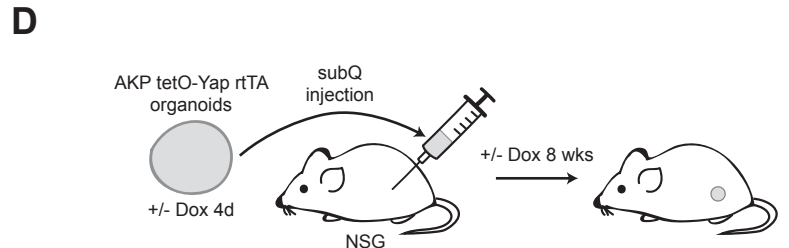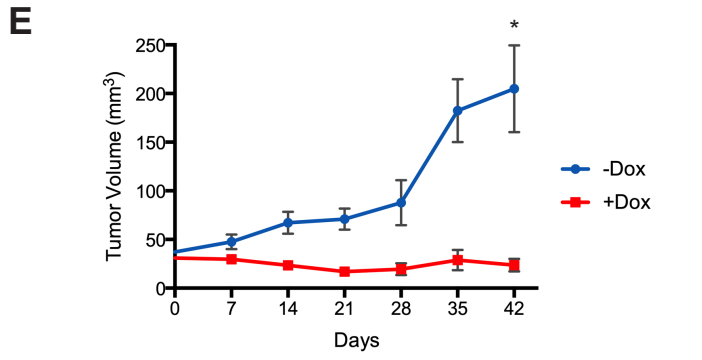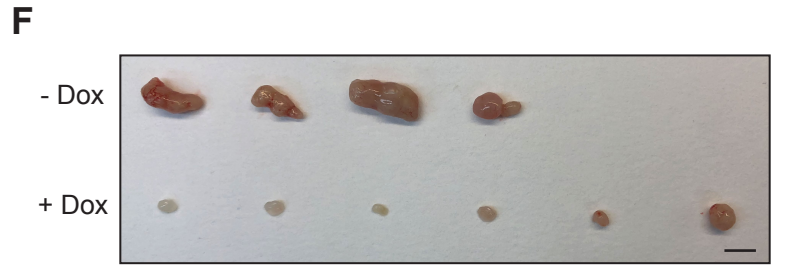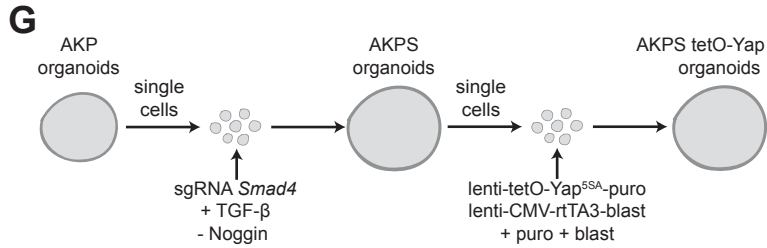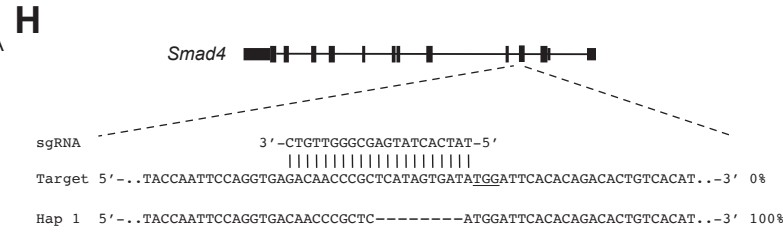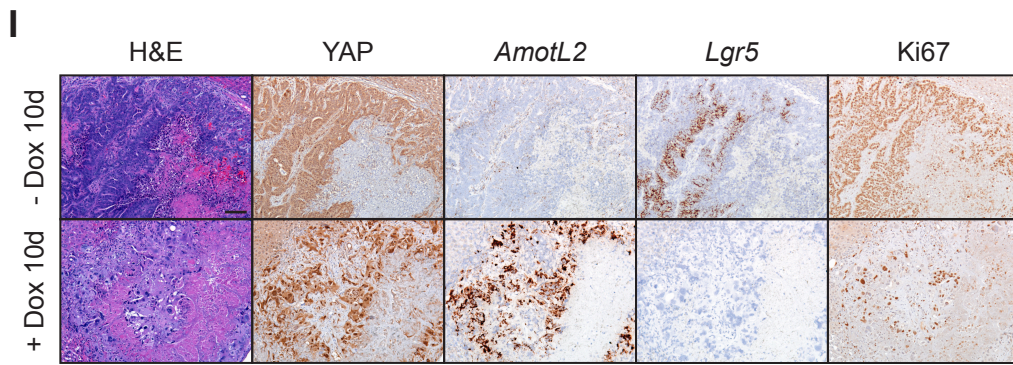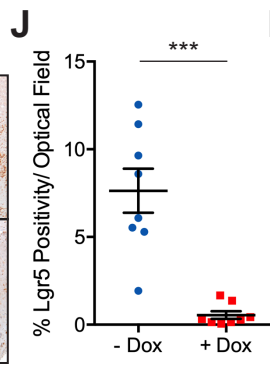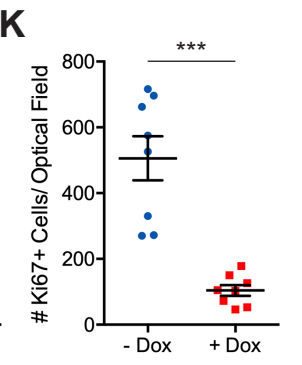



**Figure S6: YAP Suppresses Tumor Propagating Capacity in Primary and Metastatic CRC, Related to Figure 6**

(A) Gating strategy for isolation of *Apc*<sup>-/-</sup> *Kras*<sup>G12D</sup> *p53*<sup>-/-</sup> tetO-YAP<sup>5SA</sup> rtTA subcutaneous primary tumor cells by FACS. Tumor cells from induced and uninduced mice were sorted on forward scatter and side scatter and subsequently by EpCAM+, Lin- (CD45, TER119, CD11b), and DAPI-. Sorted cells were then injected subcutaneously into nude mice for secondary transplants.

(B) Histological analysis of *Apc*<sup>-/-</sup> *Kras*<sup>G12D</sup> *p53*<sup>-/-</sup> tetO-YAP<sup>5SA</sup> rtTA subcutaneous primary tumors 2 days after doxycycline administration: H&E stains, IHC for YAP and Ki67, and RNA-ISH for *AmotL2*, *Lgr5*, and *Axin2*. Scale bar, 50  $\mu$ m.

(C) Gross morphology of *Apc*<sup>-/-</sup> *Kras*<sup>G12D</sup> *p53*<sup>-/-</sup> tetO-YAP<sup>5SA</sup> rtTA subcutaneous tumors harvested 5 weeks following secondary transplant. Scale bar, 5 mm.

(D) Schematic of subcutaneous transplants of doxycycline-induced *Apc*<sup>-/-</sup> *Kras*<sup>G12D</sup> *p53*<sup>-/-</sup> tetO-YAP<sup>5SA</sup> rtTA organoids into nude mice and doxycycline administration.

(E) Growth curve of subcutaneous tumors from uninduced and doxycycline-induced *Apc*<sup>-/-</sup> *Kras*<sup>G12D</sup> *p53*<sup>-/-</sup> tetO-YAP<sup>5SA</sup> rtTA organoids injected into the flanks of nude mice. Measurements were started one week after injection (shown as day 0 on the graph). Data are represented as mean  $\pm$  SEM; - dox: n = 6 tumors; + dox: n = 4 tumors. \**P* < 0.05.

(F) Gross morphology of subcutaneous tumors derived from uninduced or induced *Apc*<sup>-/-</sup> *Kras*<sup>G12D</sup> *p53*<sup>-/-</sup> tetO-YAP<sup>5SA</sup> rtTA organoids 8 weeks following transplant. Scale bar, 5 mm.

(G) Schematic for generating *Apc*<sup>-/-</sup> *Kras*<sup>G12D</sup> *p53*<sup>-/-</sup> *Smad4*<sup>-/-</sup> tetO-YAP<sup>5SA</sup> rtTA organoids.

(H) Gene-targeting strategy for *Smad4*. The protospacer adjacent motif is underlined on the target sequence, and the allelic fraction of the haplotype identified is indicated.

(I) Histological analysis of *Apc*<sup>-/-</sup> *Kras*<sup>G12D</sup> *p53*<sup>-/-</sup> *Smad4*<sup>-/-</sup> tetO-YAP<sup>5SA</sup> rtTA metastases 10 days after doxycycline administration: H&E stains, IHC for YAP and Ki67, and RNA-ISH for *AmotL2* and *Lgr5*. Scale bar, 100  $\mu$ m.

(J) Quantification of *Lgr5* positive staining in uninduced and induced *Apc*<sup>-/-</sup> *Kras*<sup>G12D</sup> *p53*<sup>-/-</sup> *Smad4*<sup>-/-</sup> tetO-YAP<sup>5SA</sup> rtTA metastases from Figure S6I. Dot plot is represented as mean  $\pm$  SEM; - dox: n = 4 optical fields per mouse, n = 2 mice; + dox: n = 2 optical fields per mouse, n = 4 mice. \*\*\**P* < 0.001.

(K) Quantification of Ki67+ cells per high powered optical field in uninduced and induced *Apc*<sup>-/-</sup> *Kras*<sup>G12D</sup> *p53*<sup>-/-</sup> *Smad4*<sup>-/-</sup> tetO-YAP<sup>5SA</sup> rtTA metastases from Figure S6I. Dot plot is represented as mean  $\pm$  SEM; - dox: n = 4 optical fields per mouse, n = 2 mice; + dox: n = 2 optical fields per mouse, n = 4 mice. \*\*\**P* < 0.001.

**Figure S7**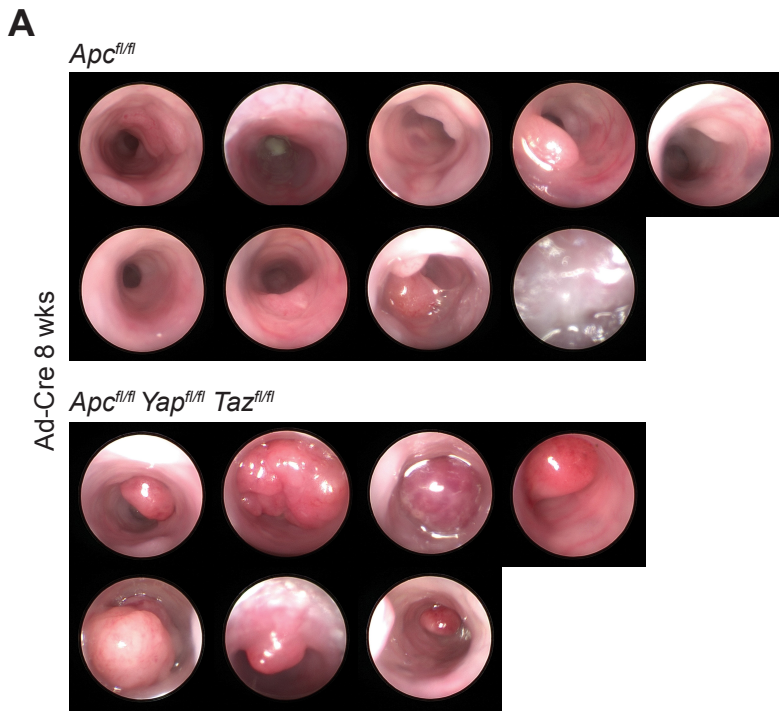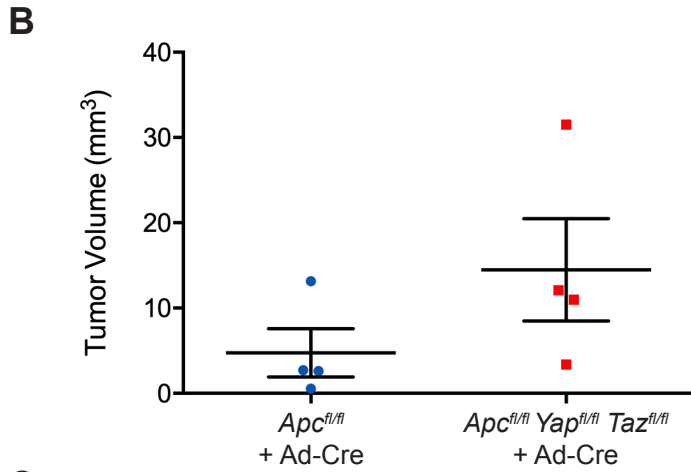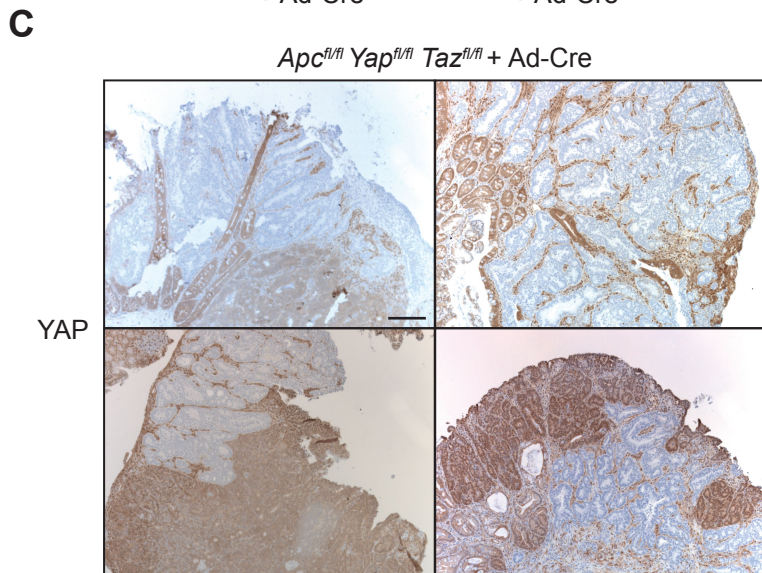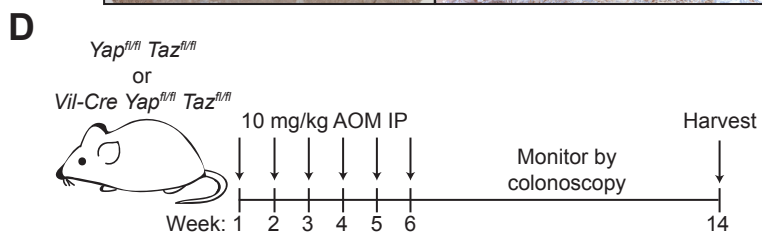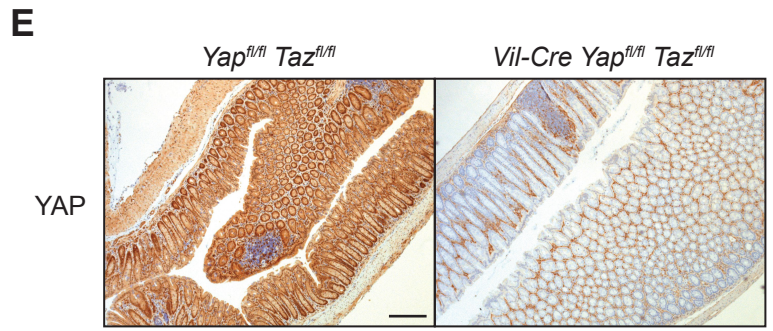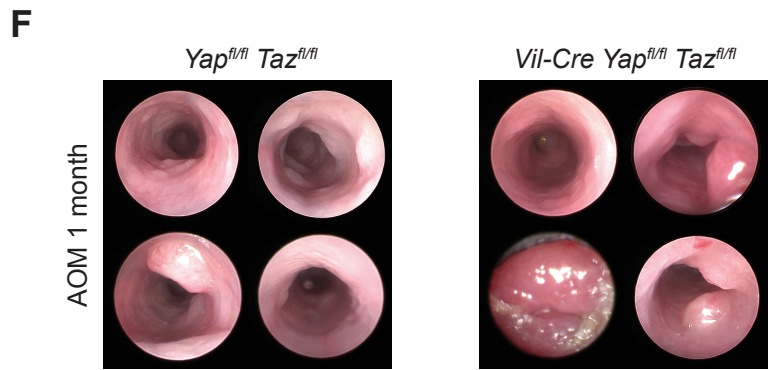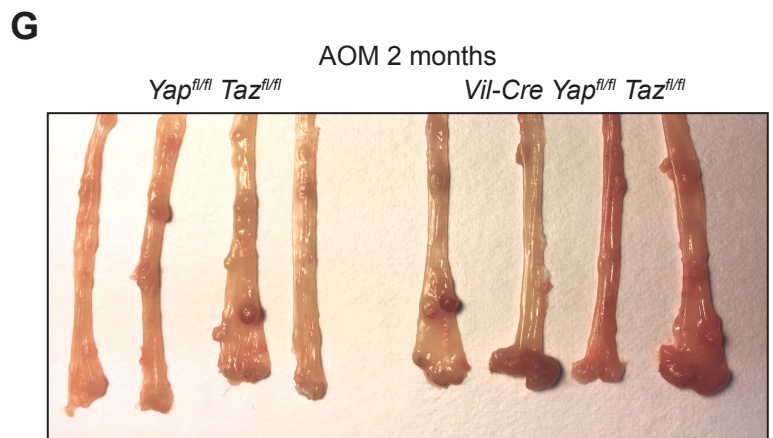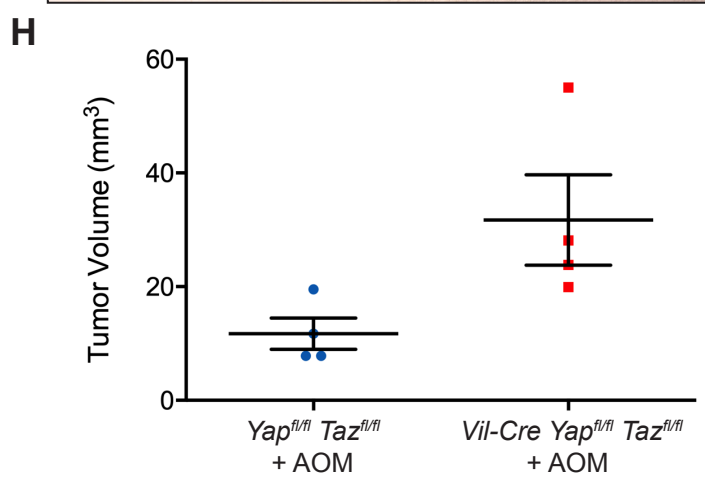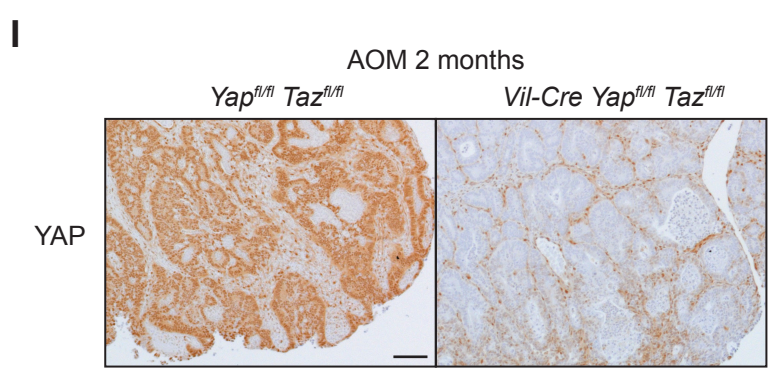

**Figure S7: YAP is Dispensable for Colon Tumor Growth, Related to Figure 7**

- (A) Colonoscopy images of mice of the indicated genotypes 8 weeks after injection with Ad-Cre in the colonic mucosa.
- (B) Volume of tumors from mice of the indicated genotypes harvested 8 weeks after injection with Ad-Cre in the colonic mucosa. Data are represented as mean  $\pm$  SEM; n = 4 tumors per genotype.
- (C) IHC for YAP in tumors from *Apc<sup>fl/fl</sup> Yap<sup>fl/fl</sup> Taz<sup>fl/fl</sup>* mice after orthotopic injection with Ad-Cre. Scale bar, 200  $\mu$ m.
- (D) Schematic of sporadic tumor formation in mice of the indicated genotypes, including timeline of azoxymethane (AOM) injection and tissue collection.
- (E) IHC for YAP in *Villin-Cre Yap<sup>fl/fl</sup> Taz<sup>fl/fl</sup>* animals and control littermates. Scale bar, 200  $\mu$ m.
- (F) Colonoscopy images of mice of the indicated genotypes one month after the last AOM injection.
- (G) Gross morphology of colons from mice of the indicated genotypes 2 months after the last AOM injection.
- (H) Quantification of tumor burden from *Yap<sup>fl/fl</sup> Taz<sup>fl/fl</sup>* and *Villin-Cre Yap<sup>fl/fl</sup> Taz<sup>fl/fl</sup>* mice after AOM-induced tumorigenesis. Data are represented as mean  $\pm$  SEM; n = 4 tumors per genotype.
- (I) IHC for YAP in AOM-induced tumors from *Yap<sup>fl/fl</sup> Taz<sup>fl/fl</sup>* and *Villin-Cre Yap<sup>fl/fl</sup> Taz<sup>fl/fl</sup>* mice. Scale bar, 100  $\mu$ m.

**Table S4. Primers for RT-qPCR, Related to STAR Methods**

| <b>Gene</b>  | <b>Direction</b> | <b>Sequence 5' to 3'</b> | <b>Source</b>       |
|--------------|------------------|--------------------------|---------------------|
| Human AMOTL2 | Forward          | AGCTTCAATGAGGGTCTGCTC    | Galli et al., 2015  |
|              | Reverse          | CTGCTGAAGGACCTTGATCACT   |                     |
| Human CYR61  | Forward          | CATTCCTCTGTGTCCCAAGAA    | Galli et al., 2015  |
|              | Reverse          | TACTATCCTCGTCACAGACCCA   |                     |
| Human GAPDH  | Forward          | CTGACTTCAACAGCGACACC     | This paper          |
|              | Reverse          | TAGCCAAATTCGTTGTCATACC   |                     |
| Human LGR5   | Forward          | CTTCCAACCTCAGCGTCTTC     | This paper          |
|              | Reverse          | TTTCCCGCAAGACGTA ACTC    |                     |
| Mouse AmotL2 | Forward          | TGGAGACTGTA CTGAGGGAGAA  | Galli et al., 2015  |
|              | Reverse          | GAGCCGCTGGATTTCA TTTTCC  |                     |
| Mouse Ankrd1 | Forward          | CATGATGCTGTGAGGCTGAAC    | Galli et al., 2015  |
|              | Reverse          | CATGATGCTGTGAGGCTGAAC    |                     |
| Mouse Axin2  | Forward          | GCCAAGTGTCTCTACCTCATTT   | This paper          |
|              | Reverse          | TCCAGCTCCAGTTTCAGTTTC    |                     |
| Mouse Cyr61  | Forward          | AGGTCTGCGCTAAACA ACTCA   | Galli et al., 2015  |
|              | Reverse          | ATATTCACAGGGTCTGCCTTCT   |                     |
| Mouse Gapdh  | Forward          | AGGTCGGTGTGAACGGATTTG    | This paper          |
|              | Reverse          | TGTAGACCATGTAGTTGAGGTCA  |                     |
| Mouse Lgr5   | Forward          | CCTACTCGAAGACTTACCCAGT   | This paper          |
|              | Reverse          | GCATTGGGGTGAATGATAGCA    |                     |
| Mouse Muc2   | Forward          | AGGGCTCGGAACTCCAGAAA     | This paper          |
|              | Reverse          | CCAGGGAATCGGTAGACATCG    |                     |
| Mouse Reg4   | Forward          | CTGGAATCCCAGGACAAAGAGTG  | Sasaki et al., 2016 |
|              | Reverse          | CTGGAGGCCTCCTCAATGTTTGC  |                     |
